# Supplementary material for: Down-regulation of miR-206 is associated with Hirschsprung disease and suppresses cell migration and proliferation in cell models
Source: PubMed Central journal article supplement (PMC4366810; doi:10.1038/srep09302), 2015-03-20
Supplement: srep09302-s1.pdf [file srep09302-s1.pdf]

**Down-regulation of miR-206 is associated with Hirschsprung disease and suppresses cell migration and proliferation in cell models**

Ankur Sharan<sup>b,c,#</sup>, Hairong Zhu<sup>a,c,#</sup>, Hua Xie<sup>a,c</sup>, Hongxing Li<sup>a,c</sup>, Junwei Tang<sup>a,c</sup>, Weibing Tang<sup>a,c</sup>, Hongwei Zhang<sup>d</sup>, Yankai Xia<sup>a,b</sup>

<sup>a</sup>State Key Laboratory of Reproductive Medicine, Institute of Toxicology, School of Public Health, Nanjing Medical University, Nanjing 211166, China

<sup>b</sup>Key Laboratory of Modern Toxicology (Nanjing Medical University), Ministry of Education, China

<sup>c</sup>Department of Pediatric Surgery, Nanjing Children's Hospital Affiliated to Nanjing Medical University, Nanjing 210008, China.

<sup>d</sup>Department of Pediatric Surgery, Xuzhou Children's Hospital Affiliated to Xuzhou Medical University, Xuzhou 221002, China.

A

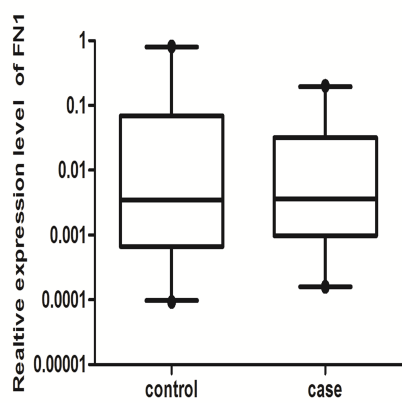

B

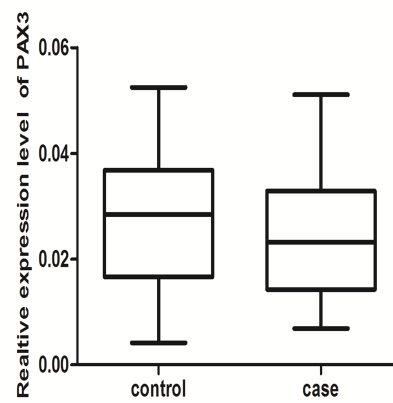

C

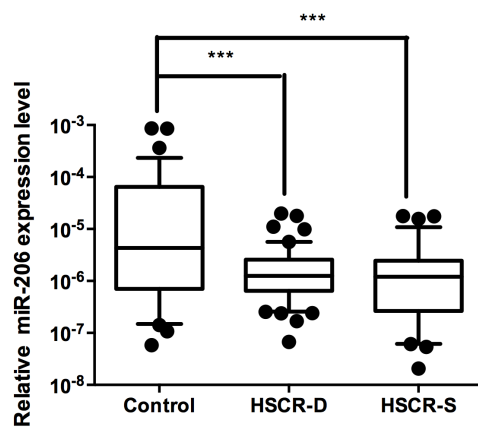

Supplementary figure A-C. No significant differences between HSCR cases and matched controls in the expression level of FN1 and PAX3 mRNA. Extra expression level of miR-206 in controls, HSCR-stenosed segments (HSCR-S) and HSCR-dilated segments (HSCR-D).

**A-B:** The relative expression levels of FN1 and PAX3 in human HSCR tissues (n=80) and control tissues (n=80) were evaluated by qRT-PCR. Data were presented as box plot of the median and range of log-transformed relative expression levels. The top and bottom of the box represent the seventy-fifth and twenty-fifth percentile. The whiskers indicate the 10th and 90th points. \* Significantly different compared with that of control ( $P<0.05$ ). **C:** QT-PCR was conducted to investigate the expression level of miR-206 in 80 matched controls, HSCR-stenosed segments (HSCR-S) and 80 HSCR-dilated segments (HSCR-D). The results showed that the expression level of HSCR-D and HSCR-S were both much lower than controls.
